# Supplementary material for: Significant Increases in EEG Anterior-Posterior Alpha and Beta Powers By Transcranial Photobiomodulation (tPBM) in Healthy Humans With Exclusion of Thermal Effects
Source: Research Square preprint supplement (doi:10.21203/rs.3.rs-359452/v1), 2021-03-31
Supplement: Supplementary file 1 [file da615ff98ebb249050d20443.docx]

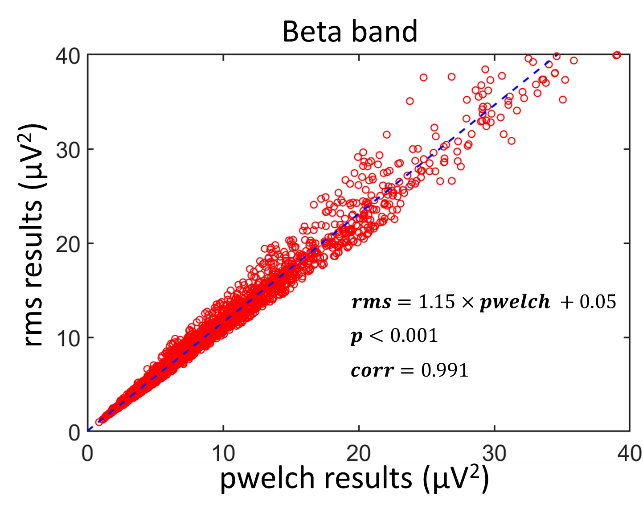

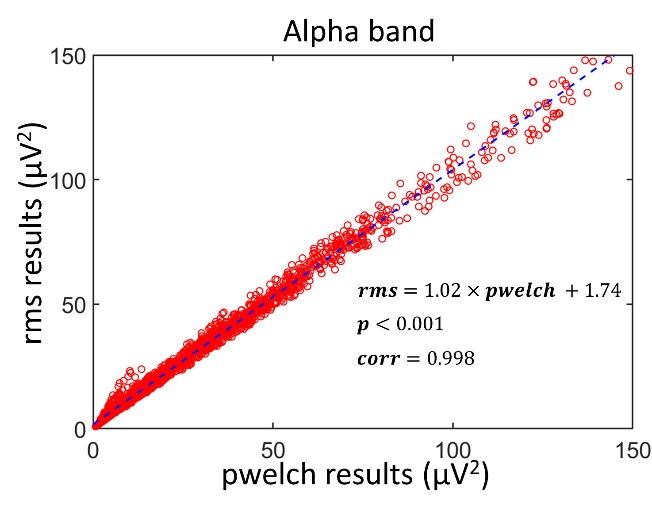

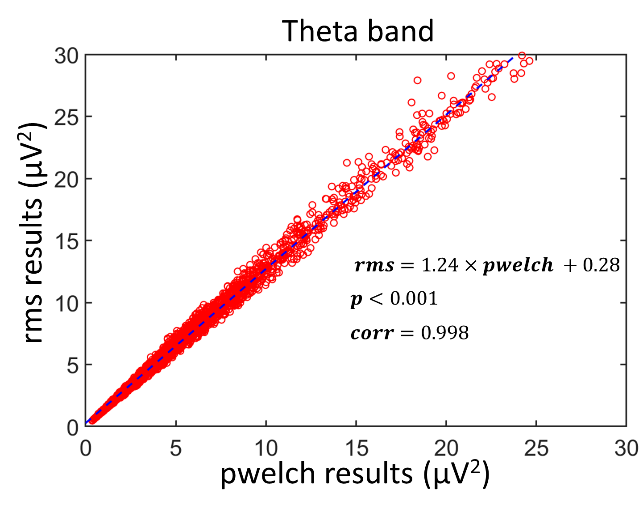

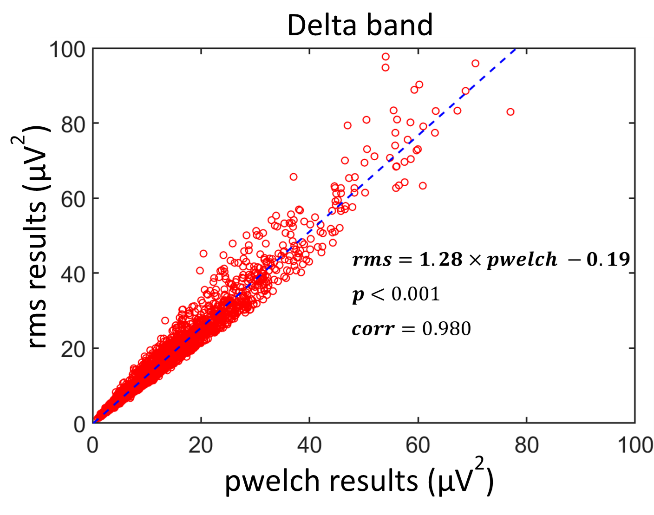

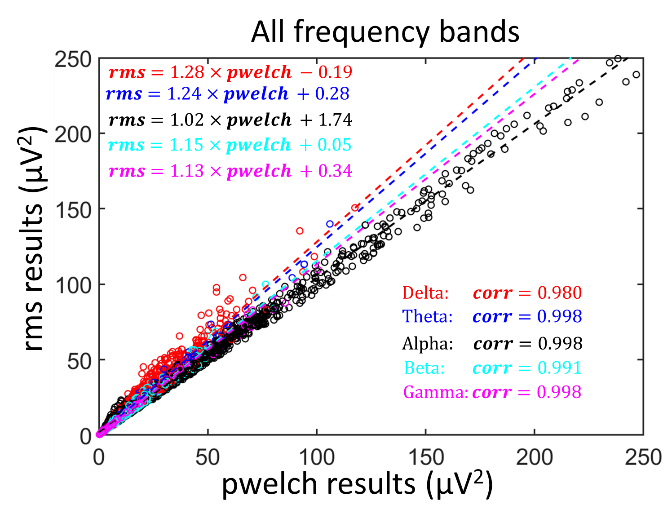

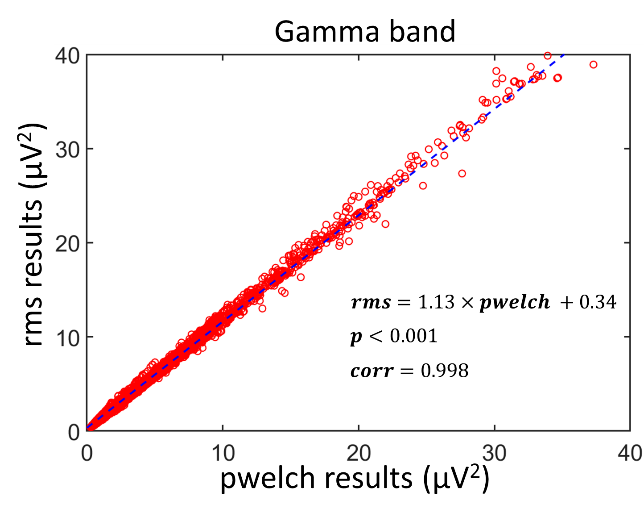


1. (b)

(c) (d)

(e) (f)

**Fig. S1** Scatter plots (red circles) between the EEG powers quantified using the ‘rms’ versus the ‘pwelch’ methods in (a) delta; (b) theta; (c) alpha; (d) beta; and (e) gamma bands. For each graph panel, the correlation coefficient (corr), linearly fitted equation, and the corresponding p-value were computed and shown to demonstrate the linear relationship and consistency in EEG powers obtained with ‘rms’ and ‘pwelch’ calcuations. (f) it shows a summary for all frequency bands together.
